# Supplementary material
Source: Royal Society of Chemistry journal article supplement (doi:10.1039/d5lc00943j)
Supplement: d5lc00943j2.xlsx [file d5lc00943j2.xlsx]

## Sheet: TITLE
			Fluid Mechanics of Thin Blood Films to Detect Anemia and Sickle Cell Disease
			Mahrukh A Mir, Mahesh S Tirumkudulu and Bhavesh Raicha
			Mahesh S Tirumkudulu
			Email: mahesh@che.iitb.ac.in

## Sheet: DataForTable1_Anemia
									TO OBTAIN CORRECT CALCULATION: Use Data->Sort->Hb
	S No	Name	mu_base	Hb	HCT	CBC	GUESS
	348		2.38	6.2	25.5	Severe	Severe			Min Viscosity	Max Viscosity	Min Hb	Max Hb
	345		2.66	6.4	27.7	Severe	Severe		Severe	0	3	0	7.9
	381		2.82548	6.4	18.6	Severe	Severe		Moderate	3	3.3	8	11
	359		2.47	6.6	24.1	Severe	Severe		Mild	3.3	3.6	11	12
	3		2.64323	6.8	20.7	Severe	Severe		Normal	3.6	`	12	20
	397		3.25973	6.9	19.8	Severe	Moderate
	372		2.6	7	22.1	Severe	Severe
	396		2.92462	7	21.6	Severe	Severe
	25		2.40424	7.4	24.4	Severe	Severe			<8.0	8.0-10.9	11.0-11.9	>=12.0	<12.0
	383		2.64323	7.4	22.5	Severe	Severe			Severe	Moderate	Mild	Normal	Anemia	Total
	116		2.55932	7.6	23.2	Severe	Severe		CBC	14	138	72	292	224	516
	250		2.73182	7.6	25.1	Severe	Severe		Guess, TP	13	55	24	226	197
	75		2.82548	7.7	25.2	Severe	Severe		Guess, FP	61	53	57	27	66
	226		2.73182	7.7	22.6	Severe	Severe		Guess, TN	441	325	387	197	226
	384		2.82548	8	23.8	Moderate	Severe		Guess, FN	1	83	48	66	27
	352		3.16	8.1	26.2	Moderate	Moderate		Start E-Row No	4	18	156	228	4
	365		2.74	8.1	24.7	Moderate	Severe		End E-Row No	17	155	227	519	227
	357		2.34	8.2	23.9	Moderate	Severe
	266		2.64323	8.3	23.9	Moderate	Severe		Severe vs Not
	370		3.02	8.4	26.5	Moderate	Moderate		Sensitivity	TP/(TP+FN)=	92.8571
	387		4.35011	8.4	24.3	Moderate	Normal		Specificity	TN/(TN+FP)=	87.8486
	95		2.55932	8.6	26	Moderate	Severe
	100		2.92462	8.6	26.1	Moderate	Severe		Normal vs Not
	347		3.03	8.6	25.8	Moderate	Moderate		Sensitivity	TP/(TP+FN)=	77.3973
	364		2.62	8.6	24.1	Moderate	Severe		Specificity	TN/(TN+FP)=	87.9464
	498		2.47976	8.6	27.7	Moderate	Severe
	237		2.92462	8.7	28.8	Moderate	Severe		Anemia vs Not
	306		2.73182	8.7	28.8	Moderate	Severe		Sensitivity	TP/(TP+FN)=	87.9464
	375		2.45	8.7	25.6	Moderate	Severe		Specificity	TN/(TN+FP)=	77.3973
	374		3.46	8.8	25.4	Moderate	Mild
	484		2.55932	8.8	29.1	Moderate	Severe
	505		2.73182	8.8	28.9	Moderate	Severe
	268		2.47976	8.9	26.5	Moderate	Severe
	272		2.64323	8.9	26.5	Moderate	Severe
	366		2.63	8.9	26.1	Moderate	Severe
	386		3.52043	8.9	27.2	Moderate	Mild
	358		2.73	9	27.9	Moderate	Severe
	177		2.92462	9.1	28	Moderate	Severe
	353		3.01	9.1	27.9	Moderate	Moderate
	373		2.82	9.1	30.7	Moderate	Severe
	155		2.92462	9.2	28.1	Moderate	Severe
	283		3.1412	9.2	28.2	Moderate	Moderate
	356		3.05	9.2	29.9	Moderate	Moderate
	389		2.92462	9.2	29.1	Moderate	Severe
	60		3.1412	9.3	29.5	Moderate	Moderate
	380		2.92462	9.3	26.9	Moderate	Severe
	67		3.52043	9.4	30	Moderate	Mild
	392		3.3859	9.4	26.2	Moderate	Mild
	35		3.1412	9.5	29.2	Moderate	Moderate
	41		3.52043	9.5	30.5	Moderate	Mild
	46		3.25973	9.5	30.6	Moderate	Moderate
	185		3.02969	9.5	31.7	Moderate	Moderate
	361		2.74	9.5	28	Moderate	Severe
	160		2.55932	9.6	30.5	Moderate	Severe
	254		2.92462	9.6	31.2	Moderate	Severe
	103		2.73182	9.7	30.8	Moderate	Severe
	4		3.1412	9.8	30.2	Moderate	Moderate
	80		3.02969	9.8	30.2	Moderate	Moderate
	145		2.92462	9.8	29.4	Moderate	Severe
	159		3.02969	9.8	31.9	Moderate	Moderate
	175		2.64323	9.8	30	Moderate	Severe
	363		2.83	9.8	27.6	Moderate	Severe
	377		3.3859	9.8	30.7	Moderate	Mild
	504		2.47976	9.8	30.3	Moderate	Severe
	2		3.1412	9.9	19.3	Moderate	Moderate
	102		3.02969	9.9	31.2	Moderate	Moderate
	333		2.82548	9.9	29.3	Moderate	Severe
	17		3.25973	10	31	Moderate	Moderate
	183		2.92462	10	31.1	Moderate	Severe
	220		3.1412	10	30.1	Moderate	Moderate
	224		3.3859	10	30.6	Moderate	Mild
	395		4.55561	10	30.7	Moderate	Normal
	418		3.02969	10	30.4	Moderate	Moderate
	454		2.92462	10	32.7	Moderate	Severe
	460		2.19921	10	31.6	Moderate	Severe
	198		3.1412	10.1	31.9	Moderate	Moderate
	310		3.02969	10.1	32.1	Moderate	Moderate
	336		2.64323	10.1	30.3	Moderate	Severe
	382		3.1412	10.1	30	Moderate	Moderate
	391		3.3859	10.1	28	Moderate	Mild
	8		3.3859	10.2	32.1	Moderate	Mild
	138		3.1412	10.2	31.5	Moderate	Moderate
	153		2.73182	10.2	32	Moderate	Severe
	339		3.02969	10.2	32.4	Moderate	Moderate
	360		3.01	10.2	29.6	Moderate	Moderate
	408		3.1412	10.2	30.8	Moderate	Moderate
	424		2.82548	10.2	32	Moderate	Severe
	38		3.98263	10.3	31.1	Moderate	Normal
	79		3.1412	10.3	33.5	Moderate	Moderate
	165		2.73182	10.3	32.6	Moderate	Severe
	217		3.52043	10.3	31.4	Moderate	Mild
	242		3.02969	10.3	30.3	Moderate	Moderate
	273		2.92462	10.3	31	Moderate	Severe		93	1	7.43	17.4		51.7
	318		3.1412	10.3	32.4	Moderate	Moderate
	355		3.18	10.3	31.5	Moderate	Moderate
	394		4.55561	10.3	29.1	Moderate	Normal
	461		2.55932	10.3	32	Moderate	Severe
	499		3.02969	10.3	32.4	Moderate	Moderate
	14		3.3859	10.4	32.3	Moderate	Mild
	21		3.25973	10.4	32.1	Moderate	Moderate
	136		3.02969	10.4	32.4	Moderate	Moderate
	286		2.73182	10.4	32.4	Moderate	Severe
	303		2.73182	10.4	32.3	Moderate	Severe
	330		3.1412	10.4	33.4	Moderate	Moderate
	385		3.98263	10.4	30.3	Moderate	Normal
	401		3.25973	10.4	31.9	Moderate	Moderate
	459		3.02969	10.4	32.6	Moderate	Moderate
	485		3.02969	10.4	33.3	Moderate	Moderate
	495		2.82548	10.4	32.2	Moderate	Severe
	118		2.92462	10.5	32	Moderate	Severe		110	1	3.61	11.5		35
	127		2.92462	10.5	33.7	Moderate	Severe
	218		3.3859	10.5	32.4	Moderate	Mild
	289		2.82548	10.5	33	Moderate	Severe
	295		3.25973	10.5	34.4	Moderate	Moderate
	331		3.25973	10.5	31.7	Moderate	Moderate
	371		3.19	10.5	31.3	Moderate	Moderate
	439		2.92462	10.5	31.3	Moderate	Severe
	148		2.92462	10.6	33.1	Moderate	Severe
	214		3.81784	10.6	32.5	Moderate	Normal
	264		2.92462	10.6	33.2	Moderate	Severe
	343		3.05	10.6	34.6	Moderate	Moderate
	354		3.05	10.6	32	Moderate	Moderate
	405		3.25973	10.6	32.7	Moderate	Moderate
	451		3.02969	10.6	33.4	Moderate	Moderate
	16		3.1412	10.7	34.3	Moderate	Moderate
	29		3.02969	10.7	33.3	Moderate	Moderate
	33		3.52043	10.7	33	Moderate	Mild		127	1	5.21	11.6		34.8
	121		2.82548	10.7	33.7	Moderate	Severe
	362		2.67	10.7	30.8	Moderate	Severe
	417		2.92462	10.7	33.2	Moderate	Severe
	420		3.66411	10.7	33.9	Moderate	Normal
	98		3.02969	10.8	33.7	Moderate	Moderate
	182		3.3859	10.8	32.9	Moderate	Mild
	255		3.02969	10.8	32.4	Moderate	Moderate
	321		3.25973	10.8	33.2	Moderate	Moderate
	326		3.3859	10.8	33.8	Moderate	Mild
	335		3.1412	10.8	32.8	Moderate	Moderate
	351		3.27	10.8	35.2	Moderate	Moderate
	465		3.1412	10.8	33.9	Moderate	Moderate
	479		2.82548	10.8	32.2	Moderate	Severe
	492		2.82548	10.8	34.4	Moderate	Severe
	59		3.98263	10.9	34.5	Moderate	Normal
	73		4.15962	10.9	33	Moderate	Normal
	158		2.92462	10.9	33	Moderate	Severe
	219		3.25973	10.9	32.5	Moderate	Moderate
	249		3.1412	10.9	33.3	Moderate	Moderate		146	1	5.85	11		34.4
	388		3.66411	10.9	32.7	Moderate	Normal
	422		3.25973	10.9	35.6	Moderate	Moderate
	449		3.25973	10.9	33.3	Moderate	Moderate
	10		3.66411	11	33.5	Moderate	Normal
	120		3.66411	11	34.4	Moderate	Normal
	368		3.69	11	33.9	Moderate	Normal
	93		3.25973	11.1	32.7	Mild	Moderate
	112		3.25973	11.1	33.6	Mild	Moderate
	191		3.1412	11.1	34.6	Mild	Moderate
	444		3.52043	11.1	35.2	Mild	Mild
	497		2.82548	11.1	34.6	Mild	Severe
	13		3.52043	11.2	35.7	Mild	Mild
	19		3.3859	11.2	34.1	Mild	Mild
	96		3.3859	11.2	34.5	Mild	Mild
	139		3.52043	11.2	35	Mild	Mild
	344		3.31	11.2	34.8	Mild	Mild
	52		3.98263	11.3	36.4	Mild	Normal
	164		3.1412	11.3	34.4	Mild	Moderate
	188		3.66411	11.3	35.8	Mild	Normal
	223		4.15962	11.3	35.4	Mild	Normal
	290		3.1412	11.3	34.7	Mild	Moderate
	327		3.66411	11.3	36.1	Mild	Normal
	329		3.02969	11.3	34.4	Mild	Moderate
	416		3.1412	11.3	35.4	Mild	Moderate
	501		2.92462	11.3	35.1	Mild	Severe
	503		3.1412	11.3	35.5	Mild	Moderate
	40		3.81784	11.4	35.6	Mild	Normal
	122		2.92462	11.4	35.3	Mild	Severe
	131		3.1412	11.4	35.9	Mild	Moderate
	146		3.1412	11.4	34.5	Mild	Moderate
	197		3.25973	11.4	34.2	Mild	Moderate
	267		3.1412	11.4	34.1	Mild	Moderate
	406		3.52043	11.4	36.1	Mild	Mild
	419		3.52043	11.4	35.1	Mild	Mild
	421		3.25973	11.4	34	Mild	Moderate
	441		3.3859	11.4	35	Mild	Mild
	477		3.52043	11.4	35.3	Mild	Mild
	487		3.66411	11.4	34.5	Mild	Normal
	66		3.98263	11.5	34	Mild	Normal
	70		3.98263	11.5	35.1	Mild	Normal
	125		3.1412	11.5	34.8	Mild	Moderate
	134		3.1412	11.5	34.2	Mild	Moderate
	166		2.92462	11.5	35.6	Mild	Severe
	455		3.66411	11.5	36	Mild	Normal
	161		3.25973	11.6	36.6	Mild	Moderate
	202		3.1412	11.6	35.1	Mild	Moderate
	315		3.52043	11.6	36.3	Mild	Mild
	325		3.3859	11.6	34.8	Mild	Mild
	367		3.18	11.6	36.6	Mild	Moderate
	94		3.3859	11.7	33.6	Mild	Mild
	473		2.82548	11.7	34	Mild	Severe
	488		3.25973	11.7	36.1	Mild	Moderate
	62		4.15962	11.8	36.1	Mild	Normal
	141		3.02969	11.8	35.6	Mild	Moderate
	154		3.25973	11.8	35.5	Mild	Moderate
	199		3.81784	11.8	35.7	Mild	Normal
	203		3.52043	11.8	36.7	Mild	Mild
	248		3.3859	11.8	36.3	Mild	Mild
	281		3.52043	11.8	36.4	Mild	Mild
	491		2.92462	11.8	36.7	Mild	Severe
	500		3.1412	11.8	36.7	Mild	Moderate
	137		3.25973	11.9	35.8	Mild	Moderate
	152		3.02969	11.9	35	Mild	Moderate
	170		3.02969	11.9	37.5	Mild	Moderate
	230		3.3859	11.9	36.4	Mild	Mild
	233		3.52043	11.9	36.2	Mild	Mild
	256		3.66411	11.9	36.9	Mild	Normal
	270		3.25973	11.9	36.7	Mild	Moderate
	411		3.3859	11.9	36.8	Mild	Mild
	429		3.52043	11.9	37.2	Mild	Mild
	467		3.1412	11.9	35.5	Mild	Moderate
	92		3.52043	12	37.4	Mild	Mild
	126		3.25973	12	37	Mild	Moderate
	178		3.52043	12	36.9	Mild	Mild
	193		3.66411	12	36.5	Mild	Normal
	244		3.52043	12	37.6	Mild	Mild
	271		3.66411	12	35.8	Mild	Normal
	307		3.3859	12	36.6	Mild	Mild
	30		3.98263	12.1	36.1	Normal	Normal
	36		4.15962	12.1	37.9	Normal	Normal
	68		4.15962	12.1	37.4	Normal	Normal
	69		4.55561	12.1	37	Normal	Normal
	147		3.25973	12.1	37.6	Normal	Moderate
	200		3.98263	12.1	36.8	Normal	Normal
	229		3.52043	12.1	37.2	Normal	Mild
	246		3.25973	12.1	38.1	Normal	Moderate
	294		3.66411	12.1	37.8	Normal	Normal
	341		3.81784	12.1	35.9	Normal	Normal
	452		3.81784	12.1	37.4	Normal	Normal
	496		3.02969	12.1	37.5	Normal	Moderate
	83		3.3859	12.2	36.7	Normal	Mild
	142		3.25973	12.2	37.9	Normal	Moderate
	231		3.3859	12.2	35.6	Normal	Mild
	269		3.25973	12.2	36.9	Normal	Moderate
	334		3.25973	12.2	38	Normal	Moderate
	403		3.52043	12.2	38.9	Normal	Mild
	448		3.52043	12.2	36.1	Normal	Mild
	31		3.81784	12.3	39.2	Normal	Normal
	63		4.55561	12.3	38.2	Normal	Normal
	81		3.52043	12.3	37.9	Normal	Mild
	88		3.81784	12.3	36	Normal	Normal
	105		3.3859	12.3	39	Normal	Mild
	106		3.25973	12.3	37.4	Normal	Moderate
	113		3.81784	12.3	37.1	Normal	Normal
	251		3.25973	12.3	37	Normal	Moderate
	350		3.31	12.3	42.2	Normal	Mild
	423		3.98263	12.3	37.2	Normal	Normal
	502		3.3859	12.3	37.7	Normal	Mild
	507		3.02969	12.3	36.9	Normal	Moderate
	511		3.52043	12.3	37.3	Normal	Mild
	512		3.25973	12.3	37.9	Normal	Moderate
	15		3.66411	12.4	37.6	Normal	Normal
	49		3.98263	12.4	38.2	Normal	Normal
	53		3.81784	12.4	37.6	Normal	Normal
	187		3.81784	12.4	37.9	Normal	Normal
	228		3.66411	12.4	36.5	Normal	Normal
	282		3.3859	12.4	38.1	Normal	Mild
	302		3.66411	12.4	36.8	Normal	Normal
	313		3.25973	12.4	36.8	Normal	Moderate
	338		3.52043	12.4	38	Normal	Mild
	402		3.66411	12.4	38	Normal	Normal
	442		3.25973	12.4	36.4	Normal	Moderate
	510		3.02969	12.4	37.4	Normal	Moderate
	58		4.35011	12.5	37	Normal	Normal
	97		3.98263	12.5	38.5	Normal	Normal
	143		3.3859	12.5	37.6	Normal	Mild
	157		3.1412	12.5	37.5	Normal	Moderate
	171		3.52043	12.5	38.1	Normal	Mild
	195		3.3859	12.5	38.1	Normal	Mild
	239		3.66411	12.5	37.4	Normal	Normal
	430		3.25973	12.5	37	Normal	Moderate
	434		3.3859	12.5	37.7	Normal	Mild
	18		3.98263	12.6	36.4	Normal	Normal
	20		3.81784	12.6	37.9	Normal	Normal
	107		3.25973	12.6	37.8	Normal	Moderate
	215		3.3859	12.6	37.5	Normal	Mild
	247		3.66411	12.6	37.6	Normal	Normal
	257		3.52043	12.6	38.7	Normal	Mild
	288		3.25973	12.6	40.2	Normal	Moderate
	319		4.15962	12.6	39.2	Normal	Normal
	407		3.52043	12.6	39.2	Normal	Mild
	431		3.3859	12.6	38.1	Normal	Mild
	476		3.1412	12.6	37.8	Normal	Moderate
	489		3.52043	12.6	38.2	Normal	Mild
	85		3.66411	12.7	40.4	Normal	Normal
	90		3.66411	12.7	38.4	Normal	Normal
	173		3.3859	12.7	37.7	Normal	Mild
	207		3.98263	12.7	39.3	Normal	Normal
	221		3.66411	12.7	38.9	Normal	Normal
	261		3.66411	12.7	38.4	Normal	Normal
	332		3.98263	12.7	38.1	Normal	Normal
	409		3.52043	12.7	38.1	Normal	Mild
	425		3.52043	12.7	37.8	Normal	Mild
	174		3.3859	12.8	38.1	Normal	Mild
	252		3.98263	12.8	39	Normal	Normal
	293		3.1412	12.8	37.5	Normal	Moderate
	297		3.3859	12.8	38.5	Normal	Mild
	393		3.81784	12.8	35.7	Normal	Normal
	463		3.25973	12.8	39.1	Normal	Moderate
	508		3.1412	12.8	38.1	Normal	Moderate
	82		3.98263	12.9	39	Normal	Normal
	186		3.66411	12.9	39.2	Normal	Normal
	346		3.64	12.9	44.6	Normal	Normal
	483		3.3859	12.9	38.9	Normal	Mild
	45		4.15962	13	39.5	Normal	Normal
	128		3.1412	13	39.6	Normal	Moderate
	133		3.81784	13	39.1	Normal	Normal
	263		3.81784	13	39.4	Normal	Normal
	275		3.52043	13	39.4	Normal	Mild
	298		3.66411	13	39.5	Normal	Normal
	311		3.98263	13	39.3	Normal	Normal
	324		3.52043	13	39	Normal	Mild
	443		3.81784	13	39.9	Normal	Normal
	12		3.81784	13.1	40	Normal	Normal
	28		3.81784	13.1	39.8	Normal	Normal
	72		4.55561	13.1	41.2	Normal	Normal
	194		3.81784	13.1	38.7	Normal	Normal
	427		3.66411	13.1	40.8	Normal	Normal
	47		4.55561	13.2	40.7	Normal	Normal
	104		3.81784	13.2	40	Normal	Normal
	114		3.98263	13.2	40	Normal	Normal
	119		3.81784	13.2	40.2	Normal	Normal
	172		3.66411	13.2	39.5	Normal	Normal
	241		4.35011	13.2	41.1	Normal	Normal
	262		4.15962	13.2	40.7	Normal	Normal
	305		4.15962	13.2	40.9	Normal	Normal
	323		5.01868	13.2	38.9	Normal	Normal
	398		4.67	13.2	40.3	Normal	Normal
	426		3.52043	13.2	40.7	Normal	Mild
	457		3.66411	13.2	40.4	Normal	Normal
	480		3.66411	13.2	40.1	Normal	Normal
	515		3.25973	13.2	41.5	Normal	Moderate
	22		3.81784	13.3	40.3	Normal	Normal
	34		3.66411	13.3	40.1	Normal	Normal
	43		4.35011	13.3	40.5	Normal	Normal
	51		3.81784	13.3	40.5	Normal	Normal
	296		3.52043	13.3	38.9	Normal	Mild
	312		3.98263	13.3	40.9	Normal	Normal
	320		3.98263	13.3	40.4	Normal	Normal
	435		3.52043	13.3	39.7	Normal	Mild
	456		4.35011	13.3	40	Normal	Normal
	474		3.52043	13.3	41.4	Normal	Mild
	486		4.15962	13.3	40.1	Normal	Normal
	490		3.3859	13.3	39.4	Normal	Mild
	493		3.3859	13.3	40.9	Normal	Mild
	509		3.25973	13.3	40.9	Normal	Moderate
	77		3.98263	13.4	41	Normal	Normal
	89		3.98263	13.4	41.3	Normal	Normal
	123		3.52043	13.4	41.1	Normal	Mild
	176		3.81784	13.4	41.5	Normal	Normal
	232		4.35011	13.4	41.1	Normal	Normal
	274		3.66411	13.4	41.2	Normal	Normal
	301		3.66411	13.4	41.2	Normal	Normal
	322		3.52043	13.4	41	Normal	Mild
	337		3.66411	13.4	40.2	Normal	Normal
	23		4.15962	13.5	40.7	Normal	Normal
	61		4.77781	13.5	41.4	Normal	Normal
	91		3.98263	13.5	41.5	Normal	Normal
	130		4.55561	13.5	41	Normal	Normal
	292		3.66411	13.5	41.3	Normal	Normal
	300		3.81784	13.5	40.8	Normal	Normal
	328		3.81784	13.5	40.2	Normal	Normal
	415		3.66411	13.5	40.8	Normal	Normal
	64		4.35011	13.6	41.4	Normal	Normal
	78		4.35011	13.6	40.4	Normal	Normal
	86		3.52043	13.6	41.2	Normal	Mild
	184		3.98263	13.6	41.3	Normal	Normal
	208		4.35011	13.6	41.3	Normal	Normal
	259		3.66411	13.6	40.6	Normal	Normal
	453		3.98263	13.6	41.9	Normal	Normal
	494		3.66411	13.6	40.5	Normal	Normal
	27		4.35011	13.7	42.6	Normal	Normal
	308		4.15962	13.7	42.3	Normal	Normal
	404		4.35011	13.7	42.4	Normal	Normal
	506		3.66411	13.7	42.1	Normal	Normal
	514		3.98263	13.7	42.5	Normal	Normal
	11		4.15962	13.8	43.2	Normal	Normal
	24		3.98263	13.8	40.7	Normal	Normal
	57		4.55561	13.8	42.5	Normal	Normal
	76		4.35011	13.8	42.4	Normal	Normal
	132		3.81784	13.8	41.2	Normal	Normal
	162		3.52043	13.8	42.6	Normal	Mild
	167		3.66411	13.8	41.9	Normal	Normal
	169		3.66411	13.8	41.8	Normal	Normal
	196		3.98263	13.8	42.3	Normal	Normal
	265		4.15962	13.8	41.4	Normal	Normal
	316		4.35011	13.8	40.9	Normal	Normal
	376		4.35011	13.8	40.6	Normal	Normal
	379		4.77781	13.8	43.6	Normal	Normal
	440		3.52043	13.8	39.7	Normal	Mild
	144		3.81784	13.9	42.6	Normal	Normal
	258		3.66411	13.9	41.1	Normal	Normal
	446		4.55561	13.9	41.4	Normal	Normal
	9		4.15962	14	43.1	Normal	Normal
	87		4.15962	14	41.7	Normal	Normal
	410		3.81784	14	43	Normal	Normal
	39		4.15962	14.1	42.9	Normal	Normal
	163		3.81784	14.1	42.2	Normal	Normal
	209		3.98263	14.1	42.2	Normal	Normal
	211		4.15962	14.1	42.5	Normal	Normal
	299		3.98263	14.1	41.3	Normal	Normal
	413		4.35011	14.1	42	Normal	Normal
	437		4.15962	14.1	42.3	Normal	Normal
	42		4.55561	14.2	42.5	Normal	Normal
	71		4.55561	14.2	43.4	Normal	Normal
	150		3.81784	14.2	43.1	Normal	Normal
	253		4.77781	14.2	43.9	Normal	Normal
	349		3.6	14.2	43.4	Normal	Mild
	48		4.15962	14.3	42.5	Normal	Normal
	55		4.77781	14.3	43.1	Normal	Normal
	140		3.81784	14.3	43.6	Normal	Normal
	234		4.15962	14.3	43.7	Normal	Normal
	279		4.15962	14.3	43	Normal	Normal
	280		3.98263	14.3	42.9	Normal	Normal
	304		4.35011	14.3	42.5	Normal	Normal
	342		4.35011	14.3	42.9	Normal	Normal
	369		4	14.3	45	Normal	Normal
	433		3.52043	14.3	43.4	Normal	Mild
	481		3.81784	14.3	43	Normal	Normal
	115		4.55561	14.4	43.5	Normal	Normal
	117		4.55561	14.4	43.1	Normal	Normal
	201		4.77781	14.4	43.2	Normal	Normal
	213		4.77781	14.4	42.7	Normal	Normal
	216		3.81784	14.4	43.3	Normal	Normal
	235		3.98263	14.4	43.5	Normal	Normal
	278		3.98263	14.4	43.8	Normal	Normal
	317		3.98263	14.4	42.6	Normal	Normal
	378		4.77781	14.4	44.5	Normal	Normal
	390		5.01868	14.4	42.2	Normal	Normal
	6		4.15962	14.5	45.1	Normal	Normal
	65		5.01868	14.5	42.8	Normal	Normal
	204		3.81784	14.5	43.5	Normal	Normal
	222		3.81784	14.5	43.6	Normal	Normal
	287		3.98263	14.5	43.8	Normal	Normal
	1		4.15962	14.6	44.4	Normal	Normal
	56		5.01868	14.6	45.3	Normal	Normal
	108		3.81784	14.6	42.5	Normal	Normal
	180		3.98263	14.6	43.9	Normal	Normal
	227		4.55561	14.6	43.4	Normal	Normal
	447		4.35011	14.6	43.9	Normal	Normal
	458		3.98263	14.6	44.1	Normal	Normal
	44		4.77781	14.7	44.8	Normal	Normal
	84		4.77781	14.7	43.2	Normal	Normal
	179		4.15962	14.7	45.4	Normal	Normal
	189		4.35011	14.7	44.8	Normal	Normal
	192		4.77781	14.7	43.5	Normal	Normal
	210		4.35011	14.7	44.1	Normal	Normal
	238		4.35011	14.7	43.3	Normal	Normal
	309		4.55561	14.7	44.5	Normal	Normal
	400		5.025	14.7	46.3	Normal	Normal
	37		5.28049	14.8	44.5	Normal	Normal
	236		4.55561	14.8	44.5	Normal	Normal
	412		4.55561	14.8	44.7	Normal	Normal
	432		3.98263	14.8	44.7	Normal	Normal
	450		4.15962	14.8	44.2	Normal	Normal
	50		4.77781	14.9	44.4	Normal	Normal
	285		4.15962	14.9	44.5	Normal	Normal
	482		4.15962	14.9	45.5	Normal	Normal
	7		4.77781	15	46.4	Normal	Normal
	54		5.01868	15	46.1	Normal	Normal
	74		5.28049	15	45.6	Normal	Normal
	124		4.55561	15	44.5	Normal	Normal
	260		4.55561	15	44.6	Normal	Normal
	428		3.81784	15	44	Normal	Normal
	464		3.66411	15	45.6	Normal	Normal
	468		3.81784	15	46.1	Normal	Normal
	472		3.66411	15	44.6	Normal	Normal
	243		4.77781	15.1	46.6	Normal	Normal
	340		4.77781	15.1	46.2	Normal	Normal
	462		5.01868	15.1	45.3	Normal	Normal
	181		4.35011	15.2	45.1	Normal	Normal
	206		4.77781	15.2	45.8	Normal	Normal
	276		4.55561	15.2	45.4	Normal	Normal
	314		4.77781	15.2	45.6	Normal	Normal
	469		3.98263	15.2	44.6	Normal	Normal
	129		4.77781	15.3	46.5	Normal	Normal
	212		5.01868	15.3	46.2	Normal	Normal
	225		4.55561	15.3	46.8	Normal	Normal
	470		4.25309	15.3	45.2	Normal	Normal
	516		4.15962	15.3	47.2	Normal	Normal
	149		4.77781	15.4	46.3	Normal	Normal
	156		4.55561	15.4	46.3	Normal	Normal
	399		5.14	15.4	44.4	Normal	Normal
	414		4.15962	15.4	45.7	Normal	Normal
	478		4.77781	15.4	46.1	Normal	Normal
	111		4.55561	15.5	45.9	Normal	Normal
	436		4.35011	15.5	45.9	Normal	Normal
	438		4.35011	15.5	46	Normal	Normal
	5		5.01868	15.6	48	Normal	Normal
	205		5.28049	15.6	46	Normal	Normal
	284		4.55561	15.6	46.3	Normal	Normal
	277		4.77781	15.7	45.5	Normal	Normal
	245		5.56589	15.8	47.7	Normal	Normal
	291		4.77781	15.8	47	Normal	Normal
	135		5.28049	15.9	48.7	Normal	Normal
	513		4.35011	15.9	47.3	Normal	Normal
	110		5.01868	16	48.8	Normal	Normal
	190		5.28049	16	48	Normal	Normal
	26		4.55561	16.1	47.1	Normal	Normal
	151		5.01868	16.1	47.9	Normal	Normal
	466		4.77781	16.1	49.1	Normal	Normal
	471		4.35011	16.1	49.2	Normal	Normal
	445		5.28049	16.2	48.5	Normal	Normal
	240		5.87795	16.8	49.5	Normal	Normal
	475		4.77781	16.8	49.4	Normal	Normal
	101		5.56589	17.2	50.6	Normal	Normal
	109		5.87795	17.2	52.1	Normal	Normal
	32		5.87795	18	33.5	Normal	Normal
	168		5.56589	18.4	54.3	Normal	Normal
	99		5.87795	18.6	54.7	Normal	Normal

## Sheet: DataForTable1_SCD
S No	HbS	Base Viscosity	%D_mu	Hb	HPLC		Guess1(%Dmu)	Guess2 (%Dmu+Hb)
160	0	2.66	10.0952	6.4	AA		AA	AA			TO OBTAIN CORRECT CALCULATION: Use Data->Sort->HPLC
161	0	3.64	7.86207	12.9	AA		AA	AA				Min Viscosity	Max Viscosity	Max %inc	Min % inc		Hb cutoff
165	-	3.31	27.3932	12.3	AA		AS	AS			AA	0	10	20	0		12.1
201	0	5.34	16.6169	14.7	AA		AA	AA			SS	0	2.7	500	70
202	0	4.6	6.85225	13.2	AA		AA	AA			AS	0	3.3	70	20
203	0	5.37	40.9533	15.4	AA		AS	AS			AS	3.3	5	300	50			Guess1:	Only %Delta mu constraint
206	0	4.96562	10.1649	15.5	AA		AA	AA			SS+HU	0	3.5	100	50			Guess2:	%Delta mu and Hb constraint
207	0	4.16145	19.3243	17.1	AA		AA	AA				Correct	Wrong	%Correct
208	0	3.30236	3.68075	12.2	AA		AA	AA				147	23	86.4706
209	0	3.42391	7.59298	14	AA		AA	AA
210	0	4.74162	9.22729	15.1	AA		AA	AA				AA	AS	SS	SCD	TOTAL
211	0	5.20781	5.04144	15.8	AA		AA	AA			HPLC	93	47	56	103	299
212	0	4.96562	4.87752	16	AA		AA	AA			Guess, TP	88	35	53	99
213	0	2.08875	2.69049	9.5	AA		AA	AA			Guess, FP	4	8	8	5
214	0	2.78966	14.2731	11.4	AA		AA	AA			Guess, TN	99	141	132	88
259	0	3.7	10.1915	11	AA		AA	AA			Guess, FN	5	12	3	4
260	0	4.1	1.66369	15.4	AA		AA	AA			Start E-Row No	2	95	142
261	0	3.3	11.3046	12.4	AA		AA	AA			End E-Row No	94	141	197
263	0	4	9.91092	13.5	AA		AA	AA
264	0	3.8	6.82267	12.2	AA		AA	AA
265	0	5	14.9855	16.3	AA		AA	AA			SS vs Others
266	0	2.7	6.59212	11.4	AA		AA	AA			Sensitivity	TP/(TP+FN)=	94.6429
267	0	2.5	17.1214	11.2	AA		AA	AA			Specificity	TN/(TN+FP)=	94.2857
268	0	3.2	11.4584	14.5	AA		AA	AA
269	0	2.9	6.89508	13.4	AA		AA	AA			AS vs Others
270	0	2.6	17.5209	12.4	AA		AA	AA			Sensitivity	TP/(TP+FN)=	74.4681
271	0	3.3	3.68075	15.1	AA		AA	AA			Specificity	TN/(TN+FP)=	94.6309
272	0	3.1	15.369	14.8	AA		AA	AA
273	0	3.3	7.59298	14.2	AA		AA	AA			AA vs Others
274	0	2.5	6.1845	11.3	AA		AA	AA			Sensitivity	TP/(TP+FN)=	94.6237
275	0	2.3	19.3243	13.2	AA		AA	AA			Specificity	TN/(TN+FP)=	96.1165
276	0	2.3	15.6902	10.5	AA		AA	AA
277	0	2.7	3.20841	11.4	AA		AA	AA			SCD vs Others
278	0	2	14.4796	9.8	AA		AA	AA			Sensitivity	TP/(TP+FN)=	96.1165
279	0	2.5	16.7397	12.4	AA		AA	AA			Specificity	TN/(TN+FP)=	94.6237
280	0	2.7	13.9417	14.1	AA		AA	AA
281	0	3.37441	6.89508	13	AA		AA	AA
282	0	3.07978	3.14855	14.4	AA		AA	AA
284	0	3.18783	3.5926	12.8	AA		AA	AA
285	0	2.97769	0	10.5	AA		AA	AA
286	0	2.70294	4.87752	12.2	AA		AA	AA
287	0	3.69063	3.97322	15.3	AA		AA	AA
288	0	2.62062	3.14122	10.4	AA		AA	AA
289	0	2.97769	10.9034	14.3	AA		AA	AA
290	0	3.30236	3.68075	14.1	AA		AA	AA
291	0	3.5531	14.7231	16.1	AA		AA	AA
292	0	2.78966	3.27853	11.4	AA		AA	AA
293	0	3.42391	12.0728	15.7	AA		AA	AA
294	0	2.97769	0	14.4	AA		AA	AA
295	0	3.42391	3.77334	14.1	AA		AA	AA
296	0	2.03496	5.40469	6.9	AA		AA	AA
297	0	3.07978	11.174	13.5	AA		AA	AA
298	0	2.97769	8.95204	13.8	AA		AA	AA
299	0	2.78966	6.7402	14.1	AA		AA	AA
300	0	2.97769	7.05725	14.7	AA		AA	AA
301	0	2.78966	10.3997	13.1	AA		AA	AA
302	0	3.5531	12.4055	16.8	AA		AA	AA
303	0	3.07978	11.174	14	AA		AA	AA
304	0	2.54239	0	12	AA		AA	AA
305	0	2.70294	0	13.3	AA		AA	AA
306	0	3.30236	1.81266	12.9	AA		AA	AA
307	0	3.07978	3.50857	13.5	AA		AA	AA
308	0	2.88112	6.89508	12.4	AA		AA	AA
309	0	2.88112	10.6456	13.6	AA		AA	AA
310	0	3.07978	13.2391	14.2	AA		AA	AA
311	0	2.46799	6.1845	11.7	AA		AA	AA
312	0	2.46799	9.51999	11.5	AA		AA	AA
313	0	2.62062	9.94041	13.3	AA		AA	AA
314	0	3.16572	1.2277	13.5	AA		AA	AA
315	0	2.32961	5.93965	11.3	AA		AA	AA
316	0	2.88112	3.35178	12.3	AA		AA	AA
317	0	3.5531	0	14.1	AA		AA	AA
318	0	3.07978	15.369	15.9	AA		AA	AA
319	0	2.88112	10.6456	12	AA		AA	AA
320	0	2.97769	3.42839	12.4	AA		AA	AA
321	0	2.88112	3.35178	12.1	AA		AA	AA
322	0	2.54239	6.31466	10.5	AA		AA	AA
323	0	2.70294	6.59212	12.2	AA		AA	AA
324	0	2.54239	0	11.5	AA		AA	AA
325	0	3.42391	0	15.1	AA		AA	AA
326	0	2.97769	7.05725	13.9	AA		AA	AA
327	0	2.78966	3.27853	13.8	AA		AA	AA
328	0	3.13303	13.408	15.3	AA		AA	AA
329	0	2.97769	14.9855	14.5	AA		AA	AA
330	0	2.78966	6.7402	11.8	AA		AA	AA
331	0	2.39714	12.7569	11.6	AA		AA	AA
332	0	2.88112	10.6456	12.5	AA		AA	AA
333	0	2.88112	3.35178	13.5	AA		AA	AA
334	0	2.46799	13.0338	10.3	AA		AA	AA
335	0	2.39714	6.05961	10.8	AA		AA	AA
D26		2.82548	40.9539	10.1	AA		AS	AS
D35		2.33247	50.9314	5.6	AA		AS	AS
D63		3.02969	43.583	10.9	AA		AS	AS
1	33.9	3.67713	39.3056	11.6	AS		AS	AS
2	27.9	3.04845	42.4755	7.8	AS		AS	AS
4	26.9	4.3	184.056	12.6	AS		SS	AS
8	23.7	2.58476	17.0581	7.2	AS		AA	AA
22	26.8	3.9	24.32	11.2	AS		AS	AS
24	28.2	4.1	21.9512	12.6	AS		AS	AS
25	30.4	3.5	40	11.2	AS		AS	AS
26	33.6	4.03	23.0769	11.5	AS		AS	AS
28	28.3	3.4	35.2941	11.5	AS		AS	AS
41	32.4	3.3	30.3	10.5	AS		AS	AS
42	33.6	4.1	34.1	12.8	AS		AS	AS
43	26.2	3.9	38.5	11	AS		AS	AS
48	26.4	3.3	36.4	12.8	AS		AS	AS
52	27.7	4.09155	17.3149	13.2	AS		AA	AA
53	27	2.68834	39.0968	8.6	AS		AS	AS
54	28.5	3.41755	37.0259	11	AS		AS	AS
56	28.1	3.28191	36.4107	11	AS		AS	AS
58	25.7	3.36667	33.3757	10.6	AS		AS	AS
59	26.3	3.85906	41.4109	12.5	AS		AS	AS
90	26.1	2.97769	45.7863	12.4	AS		AS	AS
92	25.5	2.46799	24.789	11.8	AS		AS	AS
104	25.4	2.46799	33.8078	10	AS		AS	AS
158	36.2	3.05	22.6475	10.6	AS		AS	AS
159	33.7	3.31	135.953	11.2	AS		SS	SS
163	29.5	2.38	37.8661	6.2	AS		AS	AS
164	34.3	3.6	119.74	14.2	AS		SS	AS
166	33.7	3.27	44.3001	10.8	AS		AS	AS
182	33.8	3.18	254.614	11.6	AS		SS	SS
183	39.3	3.69	202.53	11	AS		SS	SS
184	27.9	4	188.834	14.3	AS		SS	AS
191	28.7	4.1	10.2632	8.7	AS		AA	AA
193	44.1	2.75	35.0329	7.6	AS		AS	AS
196	30.6	4.43	28.3315	8.9	AS		AS	AS
197	35.1	3.27	36.6317	9	AS		AS	AS
198	32.5	4.25	69.5294	13.2	AS		AS	AS
199	25.3	4.08	38.4522	11.6	AS		AS	AS
200	26.9	3.48	13.0699	9.4	AS		AA	AA
283	39.1	2.54	70.74		AS		SS	SS
D11	33.9	3.1412	138.004	13	AS		SS	AS
D21	27	3.66411	51.9027	12.6	AS		AS	AS
D24	26.8	3.25973	53.9601	10.9	AS		AS	AS
D33	26.2	2.92462	125.576	9.9	AS		SS	SS
D43	25.6	3.1412	68.1043	12.4	AS		AS	AS
D44	25.8	3.25973	80.3202	10.2	AS		SS	SS
D47	24.9	2.73182	127.698	7.3	AS		SS	SS
D61	26.9	3.66411	287.405	13.3	AS		SS	AS
D62	26.2	2.82548	133.49	10.4	AS		SS	SS
3	82.7	3.29575	160.387	9	SS		SS	SS
23	82.1	3.9	105.128	11.8	SS		SS	SS
27	86.4	3.6	108.333	10.8	SS		SS	SS
30	79.2	3.1	125.806	8.6	SS		SS	SS
32	85.4	2.9	110.345	8.8	SS		SS	SS
34	79.8	2.8	114.286	7.2	SS		SS	SS
44	82.1	3.3	248.5	9.9	SS		SS	SS
96	76.1	2.14494	142.795	8.6	SS		SS	SS
97	75.1	2.70294	150.843	9.6	SS		SS	SS
100	83	2.39714	117.251	8.1	SS		SS	SS
190	72.7	2.45	257.988	8.7	SS		SS	SS
D10	81.4	5.28049	104.498	11.3	SS		SS	SS
D12	67.9	2.73182	103.743	12.1	SS		SS	SS
D13	74.4	2.64323	122.378	9.3	SS		SS	SS
D14	73.8	2.47976	112.944	9.4	SS		SS	SS
D15	72.8	2.82548	86.8883	11	SS		SS	SS
D16	77.7	3.1412	243.769	10.2	SS		SS	SS
D17	73	5.01868	115.166	10.6	SS		SS	SS
D18	75.4	3.1412	154.414	9.7	SS		SS	SS
D19	77.7	3.3859	218.925	10.6	SS		SS	SS
D20	78.5	3.52043	143.415	10.1	SS		SS	SS
D22	78.8	4.25309	101.483	8.8	SS		SS	SS
D23	79.5	2.64323	99.7744	7.5	SS		SS	SS
D25	74.4	2.82548	35.1218	6.2	SS		AS	AS
D27	78.7	2.73182	127.698	7.5	SS		SS	SS
D28	83.6	3.1412	154.414	7	SS		SS	SS
D29	69.6	2.92462	193.004	10.5	SS		SS	SS
D30	68.9	2.82548	86.8883	8.8	SS		SS	SS
D31	76.3	2.82548	108.034	10	SS		SS	SS
D32	80.6	2.92462	215.252	8.5	SS		SS	SS
D34	80.1	2.47976	150.843	5.9	SS		SS	SS
D36	82.3	3.1412	243.769	9.4	SS		SS	SS
D37	78.5	2.92462	173.255	8.7	SS		SS	SS
D38	82.7	3.3859	136.028	8.5	SS		SS	SS
D39	75.1	2.64323	149.59	8.6	SS		SS	SS
D40	73	2.33247	138.626	6	SS		SS	SS
D41	77.2	2.82548	252.41	9.8	SS		SS	SS
D42	79.9	3.02969	43.583	10.8	SS		AS	AS
D45	66.5	3.25973	53.9601	9.3	SS		AS	AS
D48	84.3	3.25973	70.7469	7.5	SS		SS	SS
D49	71.9	4.77781	197.102	11.1	SS		SS	SS
D50	83.2	3.3859	247.475	9.2	SS		SS	SS
D51	83	3.98263	398.116	7.9	SS		SS	SS
D55	80.3	2.73182	93.2955	9.2	SS		SS	SS
D56	75.6	2.73182	237.5	11.5	SS		SS	SS
D57	67.6	3.52043	127.008	9	SS		SS	SS
D58	85.6	2.73182	173.67	6.4	SS		SS	SS
D59	68.5	3.66411	151.627	11.4	SS		SS	SS
D64	76.3	2.73182	141.495	8.7	SS		SS	SS
D65	75.2	2.82548	148.235	6.4	SS		SS	SS
D66	79	3.1412	154.414	8.5	SS		SS	SS
D67	73.5	2.92462	155.629	10.2	SS		SS	SS
D68	86.1	3.66411	118.106	8.5	SS		SS	SS
D69	79.5	2.47976	150.843	9.9	SS		SS	SS
D8	67.5	3.3859	136.028	10.4	SS		SS	SS
D9	81.7	3.02969	131.503	9.7	SS		SS	SS
18	60	3.1	71.2903	9	SS+HU		SS	SS
29	79.2	2.9	51.7241	9	SS+HU		AS	AS
31	72.7	2.8	64.2857	8.8	SS+HU		AS	AS
33	77.1	3.2	43.75	9.1	SS+HU		AS	AS
35	73.2	3.1	103.226	7.8	SS+HU		SS	SS
36	75	4.5	62.79	10	SS+HU		AS	AS
37	54.2	3.2	59.375	9.5	SS+HU		AS	AS
38	75.9	2.7	70.3704	8.5	SS+HU		SS	SS
39	81.5	3.3	93.54	9.6	SS+HU		SS	SS
40	75.6	4.6	91.3043	12.2	SS+HU		SS	AS
46	77.5	4.1	54	8.4	SS+HU		AS	AS
50	72.5	3.68373	51.2857	9.9	SS+HU		AS	AS
51	80	3.20408	57.5385	8.5	SS+HU		AS	AS
55	81.6	3.47962	70.5742	9	SS+HU		SS	SS
57	66.7	3.17061	52.4246	9.4	SS+HU		AS	AS
84	79.3	2.00893	80.2346	7.3	SS+HU		SS	SS
162	74.5	3.03	58.277	8.6	SS+HU		AS	AS
167	74.6	3.16	69.8873	8.1	SS+HU		AS	AS
168	70.9	3.01	105.611	9.1	SS+HU		SS	SS
169	64.4	3.05	204.785	10.6	SS+HU		SS	SS
170	70.9	3.18	17.3107	10.3	SS+HU		AA	AA
171	79	3.05	69.0516	9.2	SS+HU		AS	AS
172	73.5	2.34	62.8631	8.2	SS+HU		AS	AS
173	71	2.73	90.9615	9	SS+HU		SS	SS
174	87.2	2.47	49.9037	6.6	SS+HU		AS	AS
175	57.8	3.01	71.2544	10.2	SS+HU		SS	SS
176	72.8	2.74	82.9945	9.5	SS+HU		SS	SS
177	69	2.67	76.0949	10.7	SS+HU		SS	SS
178	72.6	2.83	196.335	9.8	SS+HU		SS	SS
179	71.4	2.62	168	8.6	SS+HU		SS	SS
180	77	2.74	57.8755	8.1	SS+HU		AS	AS
181	70.7	2.63	85.3974	8.9	SS+HU		SS	SS
185	63.4	3.02	35.1575	8.4	SS+HU		AS	AS
186	69.6	3.19	79.173	10.5	SS+HU		SS	SS
187	79.3	2.6	88.0392	7	SS+HU		SS	SS
188	86.2	2.82	129.066	9.1	SS+HU		SS	SS
189	66.8	3.46	157.08	8.8	SS+HU		SS	SS
192	85	3.78	44.5055	8.3	SS+HU		AS	AS
194	72.6	3.9	15.8035	8.3	SS+HU		AA	AA
195	73.7	3.52	112.361	8.4	SS+HU		SS	SS
204	61.5	3.4	26.4487	8	SS+HU		AS	AS
336	75.2	3.18783	112.7	10.7	SS+HU		SS	SS
D46	80.1	2.33247	34.6726	6.7	SS+HU		AS	AS
D52	66.9	4.15962	139.38	10.3	SS+HU		SS	SS
D60	82.6	3.3859	94.8439	9.6	SS+HU		SS	SS
D53	47.2	2.82548	69.0972	8.2	SS+TransFus		AS	AS

## Sheet: AllData_SickleCellDisease
S No	HbS	Base_Viscosity	%mu increase	Viscosity_Sickle	HPLC		Assay	TP	Guess2		TO OBTAIN CORRECT CALCULATION: Use Data->Sort->HPLC
49	0	4.7	14.8936	5.4	AA		AA	#REF!	#REF!			Min Viscosity	Max Viscosity	Max %inc	Min % inc
93	0	2.97769	14.98	3.42375	AA		AA	#REF!	#REF!		AA	0	10	17	0
101	0	2.70294	6.59	2.88106	AA		AA	#REF!	#REF!		SS	0	2.7	500	70
126	n	2.73159	23.943	3.38561	AA		AS	#REF!	#REF!		AS	0	3.3	70	17
138	n	2.92436	36.176	3.98228	AA		AS	#REF!	#REF!		AS	3.3	5	300	50
160	-	2.66	10.0952	2.92853	AA		AA	#REF!	#REF!		SS+HU	0	3.5	100	50
161	-	3.64	7.86207	3.92618	AA		AA	#REF!	#REF!			Correct	Wrong	%Correct
165	-	3.31	27.3932	4.21672	AA		AS	1	SS			182	29	86.2559
201	0	5.34	16.6169	6.22734	AA		AA	1	SS									Correct	Wrong	%correct
202	0	4.6	6.85225	4.9152	AA		AA	1	SS			AA	AS	SS	SCD	SS+HU	Total	181	32	0.849765
203	0	5.37	40.9533	7.56919	AA		AS	0	SS		HPLC	104	138	63	201	89	394
206	0	4.96562	10.1649	5.47036	AA		AA	0	SS		Guess, TP	92	104	59	190
207	0	4.16145	19.3243	4.96562	AA		AS	1	SS		Guess, FP	11	16	23	12
208	0	3.30236	3.68075	3.42391	AA		AA	1	SS		Guess, TN	190	151	219	92
209	0	3.42391	7.59298	3.68389	AA		AA	0	SS		Guess, FN	12	34	4	11
210	0	4.74162	9.22729	5.17915	AA		AA	1	SS		Start E-Row No	3	107	245
211	0	5.20781	5.04144	5.47036	AA		AA	1	SS		End E-Row No	106	244	307
212	0	4.96562	4.87752	5.20781	AA		AA	0	SS
213	0	2.08875	2.69049	2.14494	AA		AA	#REF!	#REF!
214	0	2.78966	14.2731	3.18783	AA		AA	1	SS		SS vs Others
259	0	3.7	10.1915	4.07709	AA		AA	0	SS		Sensitivity	TP/(TP+FN)=	93.6508
260	0	4.1	1.66369	4.16821	AA		AA	1	SS		Specificity	TN/(TN+FP)=	90.4959
260	0	4.35011	1.66	4.42233	AA		AA	1	SS
261	0	3.3	11.3046	3.67305	AA		AA	1	SS		AS vs Others
262	0	4	8.43709	4.33748	AA		AA	1	SS		Sensitivity	TP/(TP+FN)=	75.3623
263	0	4	9.91092	4.39644	AA		AA	1	SS		Specificity	TN/(TN+FP)=	90.4192
264	0	3.8	6.82267	4.05926	AA		AA	#REF!	#REF!
265	0	5	14.9855	5.74927	AA		AA	1	SS		AA vs Others
266	0	2.7	6.59212	2.87799	AA		AA	1	SS		Sensitivity	TP/(TP+FN)=	88.4615
267	0	2.5	17.1214	2.92803	AA		AS	1	SS		Specificity	TN/(TN+FP)=	94.5274
268	0	3.2	11.4584	3.56667	AA		AA	1	SS
269	0	2.9	6.89508	3.09996	AA		AA	1	SS		SCD vs Others
270	0	2.6	17.5209	3.05554	AA		AS	1	SS		Sensitivity	TP/(TP+FN)=	94.5274
271	0	3.3	3.68075	3.42146	AA		AA	1	SS		Specificity	TN/(TN+FP)=	88.4615
272	0	3.1	15.369	3.57644	AA		AA	1	SS
273	0	3.3	7.59298	3.55057	AA		AA	1	SS
274	0	2.5	6.1845	2.65461	AA		AA	1	SS
275	0	2.3	19.3243	2.74446	AA		AS	1	SS
276	0	2.3	15.6902	2.66087	AA		AA	0	SS
277	0	2.7	3.20841	2.78663	AA		AA	1	SS
278	0	2	14.4796	2.28959	AA		AA	1	SS
279	0	2.5	16.7397	2.91849	AA		AA	0	SS
280	0	2.7	13.9417	3.07643	AA		AA	1	SS
281	0	3.37441	6.89508	3.60708	AA		AA	1	SS
282	0	3.07978	3.14855	3.17674	AA		AA	1	SS
284	0	3.18783	3.5926	3.30236	AA		AA	1	SS
285	0	2.97769	0	2.97769	AA		AA	0	SS
286	0	2.70294	4.87752	2.83478	AA		AA	1	SS
287	0	3.69063	3.97322	3.83727	AA		AA	1	SS
288	0	2.62062	3.14122	2.70294	AA		AA	1	SS
289	0	2.97769	10.9034	3.30236	AA		AA	1	SS
290	0	3.30236	3.68075	3.42391	AA		AA	1	SS
291	0	3.5531	14.7231	4.07623	AA		AA	1	SS
292	0	2.78966	3.27853	2.88112	AA		AA	1	SS
293	0	3.42391	12.0728	3.83727	AA		AA	1	SS
294	0	2.97769	0	2.97769	AA		AA	1	AA
295	0	3.42391	3.77334	3.5531	AA		AA	1	SS
296	0	2.03496	5.40469	2.14494	AA		AA	1	SS
297	0	3.07978	11.174	3.42391	AA		AA	1	SS
298	0	2.97769	8.95204	3.24425	AA		AA	1	SS
299	0	2.78966	6.7402	2.97769	AA		AA	1	SS
300	0	2.97769	7.05725	3.18783	AA		AA	1	SS
301	0	2.78966	10.3997	3.07978	AA		AA	1	SS
302	0	3.5531	12.4055	3.99388	AA		AA	1	SS
303	0	3.07978	11.174	3.42391	AA		AA	1	SS
304	0	2.54239	0	2.54239	AA		AA	1	SS
305	0	2.70294	0	2.70294	AA		AA	1	SS
306	0	3.30236	1.81266	3.36222	AA		AA	1	SS
307	0	3.07978	3.50857	3.18783	AA		AA	1	SS
308	0	2.88112	6.89508	3.07978	AA		AA	1	SS
309	0	2.88112	10.6456	3.18783	AA		AA	1	SS
310	0	3.07978	13.2391	3.48751	AA		AA	1	SS
311	0	2.46799	6.1845	2.62062	AA		AA	1	SS
312	0	2.46799	9.51999	2.70294	AA		AA	1	SS
313	0	2.62062	9.94041	2.88112	AA		AA	1	SS
314	0	3.16572	1.2277	3.20458	AA		AA	1	SS
315	0	2.32961	5.93965	2.46799	AA		AA	1	SS
316	0	2.88112	3.35178	2.97769	AA		AA	1	SS
317	0	3.5531	0	3.5531	AA		AA	1	SS
318	0	3.07978	15.369	3.5531	AA		AA	1	SS
319	0	2.88112	10.6456	3.18783	AA		AA	1	SS
320	0	2.97769	3.42839	3.07978	AA		AA	1	SS
321	0	2.88112	3.35178	2.97769	AA		AA	1	SS
322	0	2.54239	6.31466	2.70294	AA		AA	1	SS
323	0	2.70294	6.59212	2.88112	AA		AA	1	SS
324	0	2.54239	0	2.54239	AA		AA	1	SS
325	0	3.42391	0	3.42391	AA		AA	1	SS
326	0	2.97769	7.05725	3.18783	AA		AA	1	SS
327	0	2.78966	3.27853	2.88112	AA		AA	1	SS
328	0	3.13303	13.408	3.5531	AA		AA	1	SS
329	0	2.97769	14.9855	3.42391	AA		AA	1	SS
330	0	2.78966	6.7402	2.97769	AA		AA	1	SS
331	0	2.39714	12.7569	2.70294	AA		AA	1	SS
332	0	2.88112	10.6456	3.18783	AA		AA	1	SS
333	0	2.88112	3.35178	2.97769	AA		AA	1	SS
334	0	2.46799	13.0338	2.78966	AA		AA	1	SS
335	0	2.39714	6.05961	2.5424	AA		AA	1	SS
355	0	4.35011	15.369	5.01868	AA		AA	1	SS
356	0	3.3859	17.6237	3.98263	AA		AS	1	SS
357	0	4.77781	0	4.77781	AA		AA	1	SS
358	0	4.77781	5.04144	5.01868	AA		AA	1	SS
395	0	2.82548	40.9539	3.98263	AA		AS	1	SS
404	0	2.33247	50.9314	3.52043	AA		AS	1	SS
431	0	3.02969	43.583	4.35011	AA		AS	1	SS
1	33.9	3.67713	39.3056	5.12245	AS		AS	1	SS
2	27.9	3.04845	42.4755	4.34329	AS		AS	1	SS
4	26.9	4.3	184.056	12.2144	AS		SS	1	SS
5	28.9	3.77777	103.908	7.70317	AS		SS	0	SS
6	27	3.99336	90.5987	7.61129	AS		SS	1	SS
8	23.7	2.58476	17.0581	3.02567	AS		AS	1	SS
9	26.7	4.44212	13.2582	5.03107	AS		AA	0	SS
10	27.1	4.15841	139.049	9.94065	AS		SS	0	SS
11	29.3	3.09916	24.3898	3.85504	AS		AS	0	SS
13	27.2	6.472	18.67	7.68032	AS		AS	1	SS
16	26.6	3.6	21	4.356	AS		AS	1	SS
17	34	3.7	40.5405	5.2	AS		AS	0	SS
19	28.4	3.9	51.3514	5.9027	AS		AS	0	SS
22	26.8	3.9	24.32	4.84848	AS		AS	0	SS
24	28.2	4.1	21.9512	5	AS		AS	1	SS
25	30.4	3.5	40	4.9	AS		AS	0	SS
26	33.6	4.03	23.0769	4.96	AS		AS	0	SS
28	28.3	3.4	35.2941	4.6	AS		AS	1	SS
41	32.4	3.3	30.3	4.2999	AS		AS	1	SS
42	33.6	4.1	34.1	5.4981	AS		AS	1	SS
43	26.2	3.9	38.5	5.4015	AS		AS	1	SS
47	28.1	3.4	18.5	4.029	AS		AS	1	SS
48	26.4	3.3	36.4	4.5012	AS		AS	1	SS
52	27.7	4.09155	17.3149	4.8	AS		AS	1	SS
53	27	2.68834	39.0968	3.7394	AS		AS	1	SS
54	28.5	3.41755	37.0259	4.68293	AS		AS	1	SS
56	28.1	3.28191	36.4107	4.47687	AS		AS	1	SS
58	25.7	3.36667	33.3757	4.49032	AS		AS	1	SS
59	26.3	3.85906	41.4109	5.45714	AS		AS	1	SS
63	26.6	4.06708	22.2625	4.97251	AS		AS	1	SS
64	30.1	3.21853	25.2323	4.03064	AS		AS	1	SS
65	28.1	3.13749	22.8139	3.85328	AS		AS	1	SS
66	26.8	3.75626	19.1842	4.47687	AS		AS	1	SS
67	26.7	3.3	39.3939	4.6	AS		AS	1	SS
68	26.9	4.1	22.446	5.02029	AS		AS	1	SS
69	27.3	3.63	48.7603	5.4	AS		AS	1	SS
70	35.2	4	94.6436	7.78574	AS		SS	1	SS
71	26.6	3.54814	33.9773	4.75371	AS		AS	1	SS
72	27.2	3.43812	42.4755	4.89848	AS		AS	1	SS
73	24.5	3.57485	19.7217	4.27988	AS		AS	1	SS
74	27.1	3.64525	20.9854	4.41022	AS		AS	1	SS
75	27.8	3.43812	20.8041	4.15339	AS		AS	1	SS
76	25.8	3.59098	40.565	5.04766	AS		AS	1	SS
77	27.2	3.60717	33.9773	4.83279	AS		AS	1	SS
78	26.2	3.5	37.1429	4.8	AS		AS	1	SS
79	27	3.98256	24.2965	4.95018	AS		AS	0	SS
80	26.9	4.05489	13.769	4.61321	AS		AA	1	SS
81	26.6	3.7394	11.4048	4.16587	AS		AA	1	SS
82	27	3.25738	29.2399	4.20984	AS		AS	1	SS
83	26.7	3.42391	14.3218	3.91427	AS		AA	1	SS
85	28.7	2.66125	59.6872	4.24967	AS		AS	1	SS
86	25.6	2.39714	40.2597	3.36222	AS		AS	1	SS
87	26.8	2.74573	22.4527	3.36222	AS		AS	1	SS
88	26.4	3.07978	44.0291	4.43577	AS		AS	1	SS
89	33.5	2.46799	24.789	3.07978	AS		AS	1	SS
90	26.1	2.97769	45.7863	4.34106	AS		AS	0	SS
91	27	2.03496	28.7798	2.62062	AS		AS	0	SS
92	25.5	2.46799	24.789	3.07978	AS		AS	1	SS
95	24.2	2.32962	64.717	3.83727	AS		AS	0	SS
98	24	2.70294	26.6736	3.42391	AS		AS	1	SS
102	25.2	2.88112	38.6226	3.99388	AS		AS	1	SS
103	26.1	2.5424	34.6726	3.42391	AS		AS	1	SS
104	25.4	2.46799	33.8078	3.30236	AS		AS	1	SS
106	27.8	3.76561	45.78	5.48951	AS		AS	1	SS
109	25.9	4.55522	0	4.55522	AS		AA	1	SS
110	25.9	3.38561	28.4772	4.34974	AS		AS	1	SS
111	27.7	2.92436	20.3725	3.52013	AS		AS	1	SS
113	27.7	2.73159	34.127	3.6638	AS		AS	1	SS
114	26.9	2.5591	69.9714	4.34974	AS		AS	1	SS
115	26.5	3.14093	16.6469	3.6638	AS		AA	1	SS
116	27.6	2.82524	15.369	3.25945	AS		AA	1	SS
117	27	2.643	50.6727	3.98228	AS		AS	1	SS
118	26.9	2.643	33.1869	3.52013	AS		AS	1	SS
119	27	2.47955	36.5416	3.38561	AS		AS	0	SS
120	25.9	2.82524	40.9539	3.98228	AS		AS	1	SS
121	26.8	2.82524	24.5959	3.52013	AS		AS	1	SS
122	29.3	2.82524	35.1218	3.81751	AS		AS	1	SS
123	27	2.82524	35.1218	3.81751	AS		AS	1	SS
124	28.4	3.25945	22.1766	3.98228	AS		AS	0	SS
125	34.4	3.38561	28.4772	4.34974	AS		AS	0	SS
127	25.8	2.73159	19.3243	3.25945	AS		AS	1	SS
128	26.9	3.38561	41.1089	4.7774	AS		AS		SS
129	26.2	2.5591	49.174	3.81751	AS		AS		SS
130	25.5	2.92436	30.5416	3.81751	AS		AS		SS
131	26.6	3.14093	77.1898	5.56541	AS		SS		SS
132	27.1	3.52013	23.5676	4.34974	AS		AS		SS
133	28.1	3.02943	43.583	4.34974	AS		AS		SS
134	26.1	3.14093	172.802	8.56851	AS		SS		SS
135	27.9	3.14093	45.0277	4.55522	AS		AS		SS
136	26.4	2.73159	39.7542	3.81751	AS		AS		SS
137	32.5	3.25945	12.4055	3.6638	AS		AA		SS
139	24.5	3.02943	26.0144	3.81751	AS		AS		SS
140	27.9	3.25945	27.6062	4.15926	AS		AS		SS
141	27.4	2.82524	29.681	3.6638	AS		AS		SS
142	26.1	3.02943	31.4534	3.98228	AS		AS		SS
143	26.6	3.02943	37.2953	4.15926	AS		AS		SS
144	34.9	2.92436	30.5416	3.81751	AS		AS		SS
145	28.5	2.82524	61.233	4.55522	AS		AS		SS
147	34.7	3.25945	17.1214	3.81751	AS		AS		SS
148	27.1	3.38561	48.2228	5.01825	AS		AS		SS
149	27.3	2.73159	28.8675	3.52013	AS		AS		SS
150	28	2.82524	29.681	3.6638	AS		AS		SS
151	26.7	3.02943	83.7117	5.56541	AS		SS		SS
152	27.7	2.92436	71.6014	5.01825	AS		SS		SS
153	25.9	2.82524	24.5959	3.52013	AS		AS		SS
154	26.3	3.52013	13.1288	3.98228	AS		AA		SS
155	26.6	4.7774	146.246	11.7642	AS		SS		SS
156	27.5	3.14093	138.004	7.47554	AS		SS		SS
157	24.1	3.25945	33.4502	4.34974	AS		AS		SS
158	36.2	3.05	22.6475	3.74075	AS		AS		SS
159	33.7	3.31	135.953	7.81006	AS		SS
163	29.5	2.38	37.8661	3.28121	AS		AS
164	34.3	3.6	119.74	7.91065	AS		SS
166	33.7	3.27	44.3001	4.71861	AS		AS
182	33.8	3.18	254.614	11.2767	AS		SS
183	39.3	3.69	202.53	11.1634	AS		SS
184	27.9	4	188.834	11.5533	AS		SS
191	28.7	4.1	10.2632	4.52079	AS		AA
193	44.1	2.75	35.0329	3.7134	AS		AS
196	30.6	4.43	28.3315	5.68508	AS		AS
197	35.1	3.27	36.6317	4.46786	AS		AS
198	32.5	4.25	69.5294	7.205	AS		AS
199	25.3	4.08	38.4522	5.64885	AS		AS
200	26.9	3.48	13.0699	3.93483	AS		AA
283	39.1	2.54	70.74	4.3368	AS		SS
347	27.2	3.6	23.0556	4.43	AS		AS
350	28	3.66	24.5902	4.56	AS		AS
352	28.5	3.6	113.611	7.69	AS		SS
353	26.4	3.605	26.491	4.56	AS		AS
366	29.7	4.35011	35.1218	5.87795	AS		AS
380	33.9	3.1412	138.004	7.47618	AS		SS
390	27	3.66411	51.9027	5.56589	AS		AS
393	26.8	3.25973	53.9601	5.01868	AS		AS
402	26.2	2.92462	125.576	6.59723	AS		SS
412	25.6	3.1412	68.1043	5.28049	AS		AS
413	25.8	3.25973	80.3202	5.87795	AS		SS
429	26.9	3.66411	287.405	14.195	AS		SS
430	26.2	2.82548	133.49	6.59723	AS		SS
3	82.7	3.29575	160.387	8.5817	SS		SS
7	82.1	3.4734	113.87	7.42856	SS		SS
12	82.4	3.5048	153.07	8.86959	SS		SS
21	72.6	2.6	126.923	5.9	SS		SS
23	82.1	3.9	105.128	8	SS		SS
27	86.4	3.6	108.333	7.5	SS		SS
30	79.2	3.1	125.806	7	SS		SS
32	85.4	2.9	110.345	6.1	SS		SS
34	79.8	2.8	114.286	6	SS		SS
44	82.1	3.3	248.5	11.5005	SS		SS
61	75.7	3.52163	102.385	7.12724	SS		SS
62	71.8	4	100	8	SS		SS
96	76.1	2.14494	142.795	5.20781	SS		SS
97	75.1	2.70294	150.843	6.78013	SS		SS
100	83	2.39714	117.251	5.20781	SS		SS
105	80.8	2.03496	198.129	6.06682	SS		SS
190	72.7	2.45	257.988	8.77071	SS		SS
377	67.5	3.3859	136.028	7.99167	SS		SS
378	81.7	3.02969	131.503	7.01382	SS		SS
379	81.4	5.28049	104.498	10.7985	SS		SS
381	67.9	2.73182	103.743	5.56589	SS		SS
382	74.4	2.64323	122.378	5.87795	SS		SS
383	73.8	2.47976	112.944	5.28049	SS		SS
384	72.8	2.82548	86.8883	5.28049	SS		SS
385	77.7	3.1412	243.769	10.7985	SS		SS
386	73	5.01868	115.166	10.7985	SS		SS
387	75.4	3.1412	154.414	7.99167	SS		SS
388	77.7	3.3859	218.925	10.7985	SS		SS
389	78.5	3.52043	143.415	8.56925	SS		SS
391	78.8	4.25309	101.483	8.56925	SS		SS
392	79.5	2.64323	99.7744	5.28049	SS		SS
394	74.4	2.82548	35.1218	3.81784	SS		AS
396	78.7	2.73182	127.698	6.2203	SS		SS
397	83.6	3.1412	154.414	7.99167	SS		SS
398	69.6	2.92462	193.004	8.56925	SS		SS
399	68.9	2.82548	86.8883	5.28049	SS		SS
400	76.3	2.82548	108.034	5.87795	SS		SS
401	80.6	2.92462	215.252	9.21991	SS		SS
403	80.1	2.47976	150.843	6.2203	SS		SS
405	82.3	3.1412	243.769	10.7985	SS		SS
406	78.5	2.92462	173.255	7.99167	SS		SS
407	82.7	3.3859	136.028	7.99167	SS		SS
408	75.1	2.64323	149.59	6.59723	SS		SS
409	73	2.33247	138.626	5.56589	SS		SS
410	77.2	2.82548	252.41	9.95729	SS		SS
411	79.9	3.02969	43.583	4.35011	SS		AS
414	66.5	3.25973	53.9601	5.01868	SS		AS
415	80.1	2.33247	34.6726	3.1412	SS		AS
417	84.3	3.25973	70.7469	5.56589	SS		SS
418	71.9	4.77781	197.102	14.195	SS		SS
419	83.2	3.3859	247.475	11.7652	SS		SS
420	83	3.98263	398.116	19.8381	SS		SS
423	80.3	2.73182	93.2955	5.28049	SS		SS
424	75.6	2.73182	237.5	9.21991	SS		SS
425	67.6	3.52043	127.008	7.99167	SS		SS
426	85.6	2.73182	173.67	7.47618	SS		SS
427	68.5	3.66411	151.627	9.21991	SS		SS
432	76.3	2.73182	141.495	6.59723	SS		SS
433	75.2	2.82548	148.235	7.01382	SS		SS
434	79	3.1412	154.414	7.99167	SS		SS
435	73.5	2.92462	155.629	7.47618	SS		SS
436	86.1	3.66411	118.106	7.99167	SS		SS
437	79.5	2.47976	150.843	6.2203	SS		SS
14	78.9	3.72711	43.97	5.36592	SS+HU		AS
15	72.3	3.66612	69.55	6.2159	SS+HU		AS
18	60	3.1	71.2903	5.31	SS+HU		SS
20	72.4	3.7	116.216	8	SS+HU		SS
29	79.2	2.9	51.7241	4.4	SS+HU		AS
31	72.7	2.8	64.2857	4.6	SS+HU		AS
33	77.1	3.2	43.75	4.6	SS+HU		AS
35	73.2	3.1	103.226	6.3	SS+HU		SS
36	75	4.5	62.79	7.32555	SS+HU		AS
37	54.2	3.2	59.375	5.1	SS+HU		AS
38	75.9	2.7	70.3704	4.6	SS+HU		SS
39	81.5	3.3	93.54	6.38682	SS+HU		SS
40	75.6	4.6	91.3043	8.8	SS+HU		SS
45	62.1	2.6	55	4.03	SS+HU		AS
46	77.5	4.1	54	6.314	SS+HU		AS
50	72.5	3.68373	51.2857	5.57295	SS+HU		AS
51	80	3.20408	57.5385	5.04766	SS+HU		AS
55	81.6	3.47962	70.5742	5.93534	SS+HU		SS
57	66.7	3.17061	52.4246	4.83279	SS+HU		AS
60	79.5	3	50	4.5	SS+HU		AS
84	79.3	2.00893	80.2346	3.62078	SS+HU		SS
94	66.6	2.62062	73.0118	4.53398	SS+HU		SS
99	83.1	2.2652	51.1523	3.42391	SS+HU		AS
107	73.5	2.94605	78.6323	5.26261	SS+HU		SS
108	75.1	2.78683	97	5.49006	SS+HU		SS
112	70.4	3.02943	20.9404	3.6638	SS+HU		AS
146	70.5	2.73159	34.127	3.6638	SS+HU		AS
162	74.5	3.03	58.277	4.79579	SS+HU		AS
167	74.6	3.16	69.8873	5.36844	SS+HU		AS
168	70.9	3.01	105.611	6.18888	SS+HU		SS
169	64.4	3.05	204.785	9.29596	SS+HU		SS
170	70.9	3.18	17.3107	3.73048	SS+HU		AS
171	79	3.05	69.0516	5.15607	SS+HU		AS
172	73.5	2.34	62.8631	3.811	SS+HU		AS
173	71	2.73	90.9615	5.21325	SS+HU		SS
174	87.2	2.47	49.9037	3.70262	SS+HU		AS
175	57.8	3.01	71.2544	5.15476	SS+HU		SS
176	72.8	2.74	82.9945	5.01405	SS+HU		SS
177	69	2.67	76.0949	4.70173	SS+HU		SS
178	72.6	2.83	196.335	8.38628	SS+HU		SS
179	71.4	2.62	168	7.0216	SS+HU		SS
180	77	2.74	57.8755	4.32579	SS+HU		AS
181	70.7	2.63	85.3974	4.87595	SS+HU		SS
185	63.4	3.02	35.1575	4.08176	SS+HU		AS
186	69.6	3.19	79.173	5.71562	SS+HU		SS
187	79.3	2.6	88.0392	4.88902	SS+HU		SS
188	86.2	2.82	129.066	6.45965	SS+HU		SS
189	66.8	3.46	157.08	8.89496	SS+HU		SS
192	85	3.78	44.5055	5.46231	SS+HU		AS
194	72.6	3.9	15.8035	4.51633	SS+HU		AA
195	73.7	3.52	112.361	7.47511	SS+HU		SS
204	61.5	3.4	26.4487	4.29926	SS+HU		AS
258	68.9	3.32153	239.108	11.2636	SS+HU		SS
336	75.2	3.18783	112.7	6.78052	SS+HU		SS
337	75.9	3.66	51.6393	5.55	SS+HU		AS
338	84.1	3.38	35.7988	4.59	SS+HU		AS
339	76	3.29	51.0638	4.97	SS+HU		AS
340	67.9	3.6	55.2778	5.59	SS+HU		AS
341	74.7	3.45	76.5217	6.09	SS+HU		SS
342	78.6	3.88	113.918	8.3	SS+HU		SS
343	64.8	3.37	81.6024	6.12	SS+HU		SS
344	74.4	3.35	55.5224	5.21	SS+HU		AS
345	72.3	3.29	63.5258	5.38	SS+HU		AS
346	66.9	3.47	61.6715	5.61	SS+HU		AS
348	62.9	3.1	61.2903	5	SS+HU		AS
349	67	3.35	82.6866	6.12	SS+HU		SS
351	72.4	3.255	64.6697	5.36	SS+HU		AS
354	74.6	2.8	65.7143	4.64	SS+HU		AS
359	83.3	2.92462	155.629	7.47618	SS+HU		SS
360	83	2.82548	19.8346	3.3859	SS+HU		AS
361	70.1	3.1412	45.0277	4.55561	SS+HU		AS
362	71.9	2.64323	28.0973	3.3859	SS+HU		AS
363	73.9	2.82548	53.9601	4.35011	SS+HU		AS
364	72.7	3.98263	26.0144	5.01868	SS+HU		AS
365	60.8	3.52043	87.3982	6.59723	SS+HU		SS
367	69.6	3.66411	51.9027	5.56589	SS+HU		AS
368	78.7	2.92462	112.688	6.2203	SS+HU		SS
369	67.9	5.01868	98.4045	9.95729	SS+HU		SS
370	69	3.3859	94.8439	6.59723	SS+HU		SS
371	80.6	3.3859	136.028	7.99167	SS+HU		SS
372	71.7	3.81784	83.7117	7.01382	SS+HU		SS
373	75.2	4.55561	29.0266	5.87795	SS+HU		AS
374	72.1	4.55561	137.037	10.7985	SS+HU		SS
375	73.3	2.92462	71.6014	5.01868	SS+HU		SS
376	85.7	3.25973	27.6062	4.15962	SS+HU		AS
421	66.9	4.15962	139.38	9.95729	SS+HU		SS
422	47.2	2.82548	69.0972	4.77781	SS+HU		AS
428	82.6	3.3859	94.8439	6.59723	SS+HU		SS
429	80.1	2.3	34.7	3.14	SS+HU		AS

## Sheet: Anemia_Statistics
		Severe	Others										Anemia	Normal
		2.38	2.82548		Anova: Single Factor	(Severe Anemia vs Others)							2.38	3.98263		Anova: Single Factor	(Anemia vs Normal)
		2.66	3.16										2.66	4.15962
		2.82548	2.74		SUMMARY								2.82548	4.15962		SUMMARY
		2.47	2.34		Groups	Count	Sum	Average	Variance				2.47	4.55561		Groups	Count	Sum	Average	Variance
		2.64323	2.64323		Severe Anemia	14	37.659	2.68993	0.0520352				2.64323	3.25973		Column 1	224	706.77	3.15522	0.160963
		3.25973	3.02		Others	502	1854.81	3.69485	0.450856				3.25973	3.98263		Column 2	292	1185.7	4.06063	0.345372
		2.6	4.35011										2.6	3.52043
		2.92462	2.55932		ANOVA								2.92462	3.25973		ANOVA
		2.40424	2.92462		Source of Variation	SS	df	MS	F	P-value	F crit		2.40424	3.66411		Source of Variation	SS	df	MS	F	P-value	F crit
		2.64323	3.03		Between Groups	13.7545	1	13.7545	31.2058	3.76691e-08	3.85961		2.64323	3.81784		Between Groups	103.912	1	103.912	391.579	3.27113e-65	3.85961
		2.55932	2.62		Within Groups	226.555	514	0.440769					2.55932	3.81784		Within Groups	136.398	514	0.265366
		2.73182	2.47976										2.73182	3.02969
		2.82548	2.92462		Total	240.31	515						2.82548	3.3859		Total	240.31	515
		2.73182	2.73182										2.73182	3.25973
			2.45										2.82548	3.3859
			3.46										3.16	3.25973
			2.55932										2.74	3.25973
			2.73182										2.34	3.52043
			2.47976										2.64323	3.52043
			2.64323										3.02	3.81784
			2.63										4.35011	4.55561
			3.52043										2.55932	3.52043
			2.73										2.92462	3.81784
			2.92462										3.03	3.3859
			3.01										2.62	3.25973
			2.82										2.47976	3.81784
			2.92462										2.92462	3.25973
			3.1412										2.73182	3.31
			3.05										2.45	3.98263
			2.92462										3.46	3.3859
			3.1412										2.55932	3.02969
			2.92462										2.73182	3.52043
			3.52043										2.47976	3.25973
			3.3859										2.64323	3.66411
			3.1412										2.63	3.98263
			3.52043										3.52043	3.81784
			3.25973										2.73	3.81784
			3.02969										2.92462	3.66411
			2.74										3.01	3.3859
			2.55932										2.82	3.66411
			2.92462										2.92462	3.25973
			2.73182										3.1412	3.52043
			3.1412										3.05	3.66411
			3.02969										2.92462	3.25973
			2.92462										3.1412	3.02969
			3.02969										2.92462	4.35011
			2.64323										3.52043	3.98263
			2.83										3.3859	3.3859
			3.3859										3.1412	3.1412
			2.47976										3.52043	3.52043
			3.1412										3.25973	3.3859
			3.02969										3.02969	3.66411
			2.82548										2.74	3.25973
			3.25973										2.55932	3.3859
			2.92462										2.92462	3.98263
			3.1412										2.73182	3.81784
			3.3859										3.1412	3.25973
			4.55561										3.02969	3.3859
			3.02969										2.92462	3.66411
			2.92462										3.02969	3.52043
			2.19921										2.64323	3.25973
			3.1412										2.83	4.15962
			3.02969										3.3859	3.52043
			2.64323										2.47976	3.3859
			3.1412										3.1412	3.1412
			3.3859										3.02969	3.52043
			3.3859										2.82548	3.66411
			3.1412										3.25973	3.66411
			2.73182										2.92462	3.3859
			3.02969										3.1412	3.98263
			3.01										3.3859	3.66411
			3.1412										4.55561	3.66411
			2.82548										3.02969	3.98263
			3.98263										2.92462	3.52043
			3.1412										2.19921	3.52043
			2.73182										3.1412	3.3859
			3.52043										3.02969	3.98263
			3.02969										2.64323	3.1412
			2.92462										3.1412	3.3859
			3.1412										3.3859	3.81784
			3.18										3.3859	3.25973
			4.55561										3.1412	3.1412
			2.55932										2.73182	3.98263
			3.02969										3.02969	3.66411
			3.3859										3.01	3.64
			3.25973										3.1412	3.3859
			3.02969										2.82548	4.15962
			2.73182										3.98263	3.1412
			2.73182										3.1412	3.81784
			3.1412										2.73182	3.81784
			3.98263										3.52043	3.52043
			3.25973										3.02969	3.66411
			3.02969										2.92462	3.98263
			3.02969										3.1412	3.52043
			2.82548										3.18	3.81784
			2.92462										4.55561	3.81784
			2.92462										2.55932	3.81784
			3.3859										3.02969	4.55561
			2.82548										3.3859	3.81784
			3.25973										3.25973	3.66411
			3.25973										3.02969	4.55561
			3.19										2.73182	3.81784
			2.92462										2.73182	3.98263
			2.92462										3.1412	3.81784
			3.81784										3.98263	3.66411
			2.92462										3.25973	4.35011
			3.05										3.02969	4.15962
			3.05										3.02969	4.15962
			3.25973										2.82548	5.01868
			3.02969										2.92462	4.67
			3.1412										2.92462	3.52043
			3.02969										3.3859	3.66411
			3.52043										2.82548	3.66411
			2.82548										3.25973	3.25973
			2.67										3.25973	3.81784
			2.92462										3.19	3.66411
			3.66411										2.92462	4.35011
			3.02969										2.92462	3.81784
			3.3859										3.81784	3.52043
			3.02969										2.92462	3.98263
			3.25973										3.05	3.98263
			3.3859										3.05	3.52043
			3.1412										3.25973	4.35011
			3.27										3.02969	3.52043
			3.1412										3.1412	4.15962
			2.82548										3.02969	3.3859
			2.82548										3.52043	3.3859
			3.98263										2.82548	3.25973
			4.15962										2.67	3.98263
			2.92462										2.92462	3.98263
			3.25973										3.66411	3.52043
			3.1412										3.02969	3.81784
			3.66411										3.3859	4.35011
			3.25973										3.02969	3.66411
			3.25973										3.25973	3.66411
			3.66411										3.3859	3.52043
			3.66411										3.1412	3.66411
			3.69										3.27	4.15962
			3.25973										3.1412	4.77781
			3.25973										2.82548	3.98263
			3.1412										2.82548	4.55561
			3.52043										3.98263	3.66411
			2.82548										4.15962	3.81784
			3.52043										2.92462	3.81784
			3.3859										3.25973	3.66411
			3.3859										3.1412	4.35011
			3.52043										3.66411	4.35011
			3.31										3.25973	3.52043
			3.98263										3.25973	3.98263
			3.1412										3.66411	4.35011
			3.66411										3.66411	3.66411
			4.15962										3.69	3.98263
			3.1412										3.25973	3.66411
			3.66411										3.25973	4.35011
			3.02969										3.1412	4.15962
			3.1412										3.52043	4.35011
			2.92462										2.82548	3.66411
			3.1412										3.52043	3.98263
			3.81784										3.3859	4.15962
			2.92462										3.3859	3.98263
			3.1412										3.52043	4.55561
			3.1412										3.31	4.35011
			3.25973										3.98263	3.81784
			3.1412										3.1412	3.52043
			3.52043										3.66411	3.66411
			3.52043										4.15962	3.66411
			3.25973										3.1412	3.98263
			3.3859										3.66411	4.15962
			3.52043										3.02969	4.35011
			3.66411										3.1412	4.35011
			3.98263										2.92462	4.77781
			3.98263										3.1412	3.52043
			3.1412										3.81784	3.81784
			3.1412										2.92462	3.66411
			2.92462										3.1412	4.55561
			3.66411										3.1412	4.15962
			3.25973										3.25973	4.15962
			3.1412										3.1412	3.81784
			3.52043										3.52043	4.15962
			3.3859										3.52043	3.81784
			3.18										3.25973	3.98263
			3.3859										3.3859	4.15962
			2.82548										3.52043	3.98263
			3.25973										3.66411	4.35011
			4.15962										3.98263	4.15962
			3.02969										3.98263	4.55561
			3.25973										3.1412	4.55561
			3.81784										3.1412	3.81784
			3.52043										2.92462	4.77781
			3.3859										3.66411	3.6
			3.52043										3.25973	4.15962
			2.92462										3.1412	4.77781
			3.1412										3.52043	3.81784
			3.25973										3.3859	4.15962
			3.02969										3.18	4.15962
			3.02969										3.3859	3.98263
			3.3859										2.82548	4.35011
			3.52043										3.25973	4.35011
			3.66411										4.15962	4
			3.25973										3.02969	3.52043
			3.3859										3.25973	3.81784
			3.52043										3.81784	4.55561
			3.1412										3.52043	4.55561
			3.52043										3.3859	4.77781
			3.25973										3.52043	4.77781
			3.52043										2.92462	3.81784
			3.66411										3.1412	3.98263
			3.52043										3.25973	3.98263
			3.66411										3.02969	3.98263
			3.3859										3.02969	4.77781
			3.98263										3.3859	5.01868
			4.15962										3.52043	4.15962
			4.15962										3.66411	5.01868
			4.55561										3.25973	3.81784
			3.25973										3.3859	3.81784
			3.98263										3.52043	3.98263
			3.52043										3.1412	4.15962
			3.25973										3.52043	5.01868
			3.66411										3.25973	3.81784
			3.81784										3.52043	3.98263
			3.81784										3.66411	4.55561
			3.02969										3.52043	4.35011
			3.3859										3.66411	3.98263
			3.25973										3.3859	4.77781
			3.3859											4.77781
			3.25973											4.15962
			3.25973											4.35011
			3.52043											4.77781
			3.52043											4.35011
			3.81784											4.35011
			4.55561											4.55561
			3.52043											5.025
			3.81784											5.28049
			3.3859											4.55561
			3.25973											4.55561
			3.81784											3.98263
			3.25973											4.15962
			3.31											4.77781
			3.98263											4.15962
			3.3859											4.15962
			3.02969											4.77781
			3.52043											5.01868
			3.25973											5.28049
			3.66411											4.55561
			3.98263											4.55561
			3.81784											3.81784
			3.81784											3.66411
			3.66411											3.81784
			3.3859											3.66411
			3.66411											4.77781
			3.25973											4.77781
			3.52043											5.01868
			3.66411											4.35011
			3.25973											4.77781
			3.02969											4.55561
			4.35011											4.77781
			3.98263											3.98263
			3.3859											4.77781
			3.1412											5.01868
			3.52043											4.55561
			3.3859											4.25309
			3.66411											4.15962
			3.25973											4.77781
			3.3859											4.55561
			3.98263											5.14
			3.81784											4.15962
			3.25973											4.77781
			3.3859											4.55561
			3.66411											4.35011
			3.52043											4.35011
			3.25973											5.01868
			4.15962											5.28049
			3.52043											4.55561
			3.3859											4.77781
			3.1412											5.56589
			3.52043											4.77781
			3.66411											5.28049
			3.66411											4.35011
			3.3859											5.01868
			3.98263											5.28049
			3.66411											4.55561
			3.66411											5.01868
			3.98263											4.77781
			3.52043											4.35011
			3.52043											5.28049
			3.3859											5.87795
			3.98263											4.77781
			3.1412											5.56589
			3.3859											5.87795
			3.81784											5.87795
			3.25973											5.56589
			3.1412											5.87795
			3.98263
			3.66411
			3.64
			3.3859
			4.15962
			3.1412
			3.81784
			3.81784
			3.52043
			3.66411
			3.98263
			3.52043
			3.81784
			3.81784
			3.81784
			4.55561
			3.81784
			3.66411
			4.55561
			3.81784
			3.98263
			3.81784
			3.66411
			4.35011
			4.15962
			4.15962
			5.01868
			4.67
			3.52043
			3.66411
			3.66411
			3.25973
			3.81784
			3.66411
			4.35011
			3.81784
			3.52043
			3.98263
			3.98263
			3.52043
			4.35011
			3.52043
			4.15962
			3.3859
			3.3859
			3.25973
			3.98263
			3.98263
			3.52043
			3.81784
			4.35011
			3.66411
			3.66411
			3.52043
			3.66411
			4.15962
			4.77781
			3.98263
			4.55561
			3.66411
			3.81784
			3.81784
			3.66411
			4.35011
			4.35011
			3.52043
			3.98263
			4.35011
			3.66411
			3.98263
			3.66411
			4.35011
			4.15962
			4.35011
			3.66411
			3.98263
			4.15962
			3.98263
			4.55561
			4.35011
			3.81784
			3.52043
			3.66411
			3.66411
			3.98263
			4.15962
			4.35011
			4.35011
			4.77781
			3.52043
			3.81784
			3.66411
			4.55561
			4.15962
			4.15962
			3.81784
			4.15962
			3.81784
			3.98263
			4.15962
			3.98263
			4.35011
			4.15962
			4.55561
			4.55561
			3.81784
			4.77781
			3.6
			4.15962
			4.77781
			3.81784
			4.15962
			4.15962
			3.98263
			4.35011
			4.35011
			4
			3.52043
			3.81784
			4.55561
			4.55561
			4.77781
			4.77781
			3.81784
			3.98263
			3.98263
			3.98263
			4.77781
			5.01868
			4.15962
			5.01868
			3.81784
			3.81784
			3.98263
			4.15962
			5.01868
			3.81784
			3.98263
			4.55561
			4.35011
			3.98263
			4.77781
			4.77781
			4.15962
			4.35011
			4.77781
			4.35011
			4.35011
			4.55561
			5.025
			5.28049
			4.55561
			4.55561
			3.98263
			4.15962
			4.77781
			4.15962
			4.15962
			4.77781
			5.01868
			5.28049
			4.55561
			4.55561
			3.81784
			3.66411
			3.81784
			3.66411
			4.77781
			4.77781
			5.01868
			4.35011
			4.77781
			4.55561
			4.77781
			3.98263
			4.77781
			5.01868
			4.55561
			4.25309
			4.15962
			4.77781
			4.55561
			5.14
			4.15962
			4.77781
			4.55561
			4.35011
			4.35011
			5.01868
			5.28049
			4.55561
			4.77781
			5.56589
			4.77781
			5.28049
			4.35011
			5.01868
			5.28049
			4.55561
			5.01868
			4.77781
			4.35011
			5.28049
			5.87795
			4.77781
			5.56589
			5.87795
			5.87795
			5.56589
			5.87795

## Sheet: SCD_Statistics
		AA	AS	SS	SS+HU
		14.8936	39.3056	160.387	43.97
		14.98	42.4755	113.87	69.55		Anova: Single Factor	(Sickle Cell Disease)
		6.59	184.056	153.07	71.2903
		23.943	103.908	126.923	116.216
		36.176	90.5987	105.128	51.7241		SUMMARY
		10.0952	17.0581	108.333	64.2857		Groups	Count	Sum	Average	Variance
		7.86207	13.2582	125.806	43.75		AA	104	1054.16	10.1361	85.8316
		27.3932	139.049	110.345	103.226		AS	138	6859.92	49.7095	2202.33
		16.6169	24.3898	114.286	62.79		SS	63	9173.38	145.609	3875.64
		6.85225	18.67	248.5	59.375		SS+HU	89	6791.09	76.3044	1719.94
		40.9533	21	102.385	70.3704
		10.1649	40.5405	100	93.54
		19.3243	51.3514	142.795	91.3043		ANOVA
		3.68075	24.32	150.843	55		Source of Variation	SS	df	MS	F	P-value	F crit
		7.59298	21.9512	117.251	54		Between Groups	758437	3	252812	140.411	1.07491e-61	2.62779
		9.22729	40	198.129	51.2857		Within Groups	702204	390	1800.52
		5.04144	23.0769	257.988	57.5385
		4.87752	35.2941	136.028	70.5742		Total	1.46064e+06	393
		2.69049	30.3	131.503	52.4246
		14.2731	34.1	104.498	50		Tukey HSD / Tukey Kramer
		10.1915	38.5	103.743	80.2346		Pair	Difference	SE	Q	Lower CI	Upper CI	Critical Mean	p-value
		1.66369	18.5	122.378	73.0118		Normal vs SCT	39.5734	3.8961	10.157	25.3572	53.7891	14.216	1.445e-10
		1.66	36.4	112.944	51.1523		Normal vs SCA	135.473	4.7902	28.2802	117.99	152.946	17.4782	1.235e-10
		11.3046	17.3149	86.8883	78.6323		Normal vs SCA-HU	66.1683	4.3325	15.2722	50.3575	81.9746	15.8086	1.235e-10
		8.43709	39.0968	243.769	97		SCT vs SCA	95.8997	4.5622	21.0203	79.2486	112.541	16.6461	1.238e-10
		9.91092	37.0259	115.166	20.9404		SCT vs SCA-HU	26.5949	4.0789	6.5196	11.7094	41.4764	14.8835	3.231e-05
		6.82267	36.4107	154.414	34.127		SCA vs SCA-HU	69.3048	4.94	14.0288	51.2766	87.3271	18.0253	1.235e-10
		14.9855	33.3757	218.925	58.277
		6.59212	41.4109	143.415	69.8873
		17.1214	22.2625	101.483	105.611
		11.4584	25.2323	99.7744	204.785
		6.89508	22.8139	35.1218	17.3107
		17.5209	19.1842	127.698	69.0516
		3.68075	39.3939	154.414	62.8631
		15.369	22.446	193.004	90.9615
		7.59298	48.7603	86.8883	49.9037
		6.1845	94.6436	108.034	71.2544
		19.3243	33.9773	215.252	82.9945
		15.6902	42.4755	150.843	76.0949
		3.20841	19.7217	243.769	196.335
		14.4796	20.9854	173.255	168
		16.7397	20.8041	136.028	57.8755
		13.9417	40.565	149.59	85.3974
		6.89508	33.9773	138.626	35.1575
		3.14855	37.1429	252.41	79.173
		3.5926	24.2965	43.583	88.0392
		0	13.769	53.9601	129.066
		4.87752	11.4048	34.6726	157.08
		3.97322	29.2399	70.7469	44.5055
		3.14122	14.3218	197.102	15.8035
		10.9034	59.6872	247.475	112.361
		3.68075	40.2597	398.116	26.4487
		14.7231	22.4527	93.2955	239.108
		3.27853	44.0291	237.5	112.7
		12.0728	24.789	127.008	51.6393
		0	45.7863	173.67	35.7988
		3.77334	28.7798	151.627	51.0638
		5.40469	24.789	141.495	55.2778
		11.174	64.717	148.235	76.5217
		8.95204	26.6736	154.414	113.918
		6.7402	38.6226	155.629	81.6024
		7.05725	34.6726	118.106	55.5224
		10.3997	33.8078	150.843	63.5258
		12.4055	45.78		61.6715
		11.174	0		61.2903
		0	28.4772		82.6866
		0	20.3725		64.6697
		1.81266	34.127		65.7143
		3.50857	69.9714		155.629
		6.89508	16.6469		19.8346
		10.6456	15.369		45.0277
		13.2391	50.6727		28.0973
		6.1845	33.1869		53.9601
		9.51999	36.5416		26.0144
		9.94041	40.9539		87.3982
		1.2277	24.5959		51.9027
		5.93965	35.1218		112.688
		3.35178	35.1218		98.4045
		0	22.1766		94.8439
		15.369	28.4772		136.028
		10.6456	19.3243		83.7117
		3.42839	41.1089		29.0266
		3.35178	49.174		137.037
		6.31466	30.5416		71.6014
		6.59212	77.1898		27.6062
		0	23.5676		139.38
		0	43.583		69.0972
		7.05725	172.802		94.8439
		3.27853	45.0277		34.7
		13.408	39.7542
		14.9855	12.4055
		6.7402	26.0144
		12.7569	27.6062
		10.6456	29.681
		3.35178	31.4534
		13.0338	37.2953
		6.05961	30.5416
		15.369	61.233
		17.6237	17.1214
		0	48.2228
		5.04144	28.8675
		40.9539	29.681
		50.9314	83.7117
		43.583	71.6014
			24.5959
			13.1288
			146.246
			138.004
			33.4502
			22.6475
			135.953
			37.8661
			119.74
			44.3001
			254.614
			202.53
			188.834
			10.2632
			35.0329
			28.3315
			36.6317
			69.5294
			38.4522
			13.0699
			70.74
			23.0556
			24.5902
			113.611
			26.491
			35.1218
			138.004
			51.9027
			53.9601
			125.576
			68.1043
			80.3202
			287.405
			133.49
